# Supplementary material
Source: publisher figshare collection journal article supplement (https://acs.figshare.com/ndownloader/files/26136094)
Supplement: Supplementary file 1 [file 26136094]

## Supporting Information

### **A Generalized Semi-Empirical Approach to the Modelling of the Optical Band Gap of Ternary Al-(Ga, Nb, Ta, W) Oxides Containing Different Alumina Polymorphs.**

*Francesco Di Quarto\**, *Andrea Zaffora*, *Francesco Di Franco*, *Monica Santamaria*

Università degli Studi di Palermo, Dipartimento di Ingegneria, Viale delle Scienze, 90128 Palermo, Italy

\* corresponding author: francesco.diquarto@unipa.it (phone number: +393204328592)

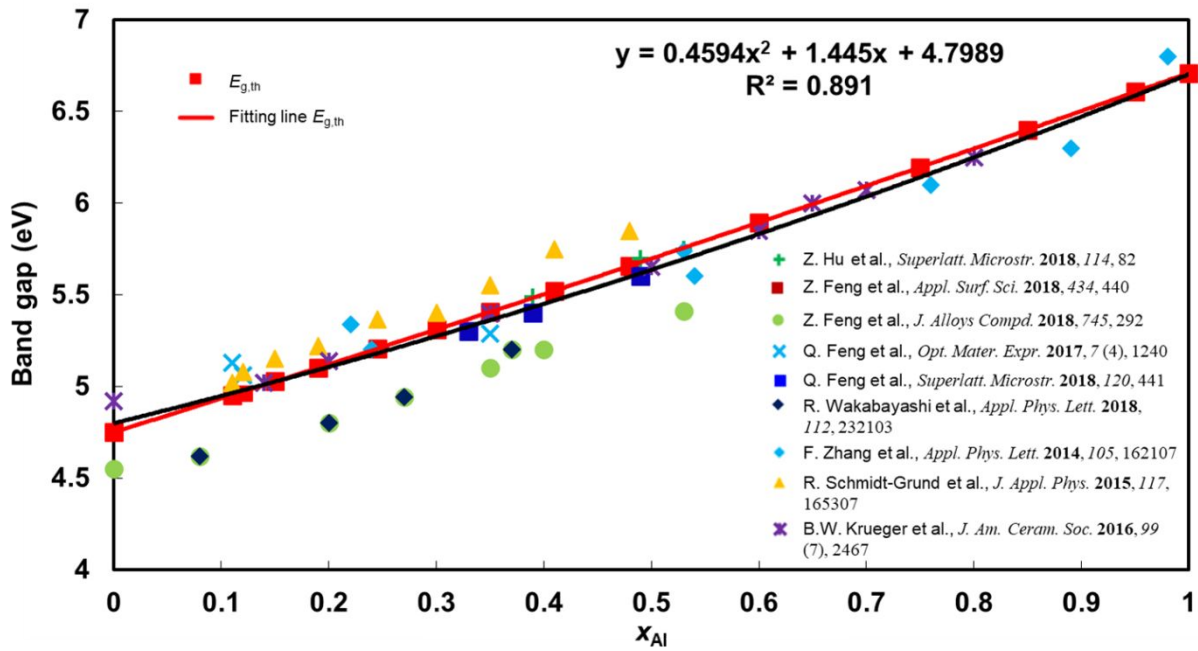

**Figure S1.** Fitting of all the experimental data pertaining  $\beta$ -( $Ga_{1-x}Al_x$ ) $_2O_3$  mixed oxides system, regardless of band gap measure technique.

*$\beta$ -( $Ga_{1-x}Al_x$ ) $_2O_3$  ternary system:  $E_g$  vs  $x_{Al}$  for direct optical transitions*

In order to complete the test on the influence of different parameters on the ability of the proposed correlation to fit the composition dependence of  $\beta$ -( $Ga_{1-x}Al_x$ ) $_2O_3$  we reported in Figure S2 the experimental  $E_{g,opt.dir}$  values of  $\beta$ -( $Ga_{1-x}Al_x$ ) $_2O_3$  derived by using the Tauc's plot approximation<sup>1</sup> and pertaining to samples grown by pulsed laser deposition (PLD). A rather limited range of Al composition ( $0.11 \leq x \leq 0.48$ ) was exploited in order to maintain the pure monoclinic structure of  $\beta$ -( $Ga_{1-x}Al_x$ ) $_2O_3$  films ( $x < 0.51$ ).

According to the authors, the best fitting linear equation of the experimental data of Figure S2 follows the equation:

$$E_{g,opt.dir} = 4.8123 + 2.1376x_{Al} \text{ [eV]} \quad E_{g1} = 6.95 \text{ eV} \quad [S1]$$

From Eq. S1 an extrapolated ( $x = 1$ ) hypothetical  $E_{g.dir}$  value of 6.95 eV is derived for monoclinic  $\theta$ - $Al_2O_3$ . The limited range of Al composition exploited ( $x_{Al} \leq 0.51$ ) could affect the extrapolated  $E_{g,opt.dir}$  value of  $\theta$ - $Al_2O_3$ , but it agrees nicely with the DFT estimated  $E_g$  values<sup>2-5</sup> and with experimental  $E_g$  value measured by REELS for crystalline Atomic Layer Deposited (ALD)<sup>6</sup> or sputtered  $Al_2O_3$  films.<sup>7</sup>

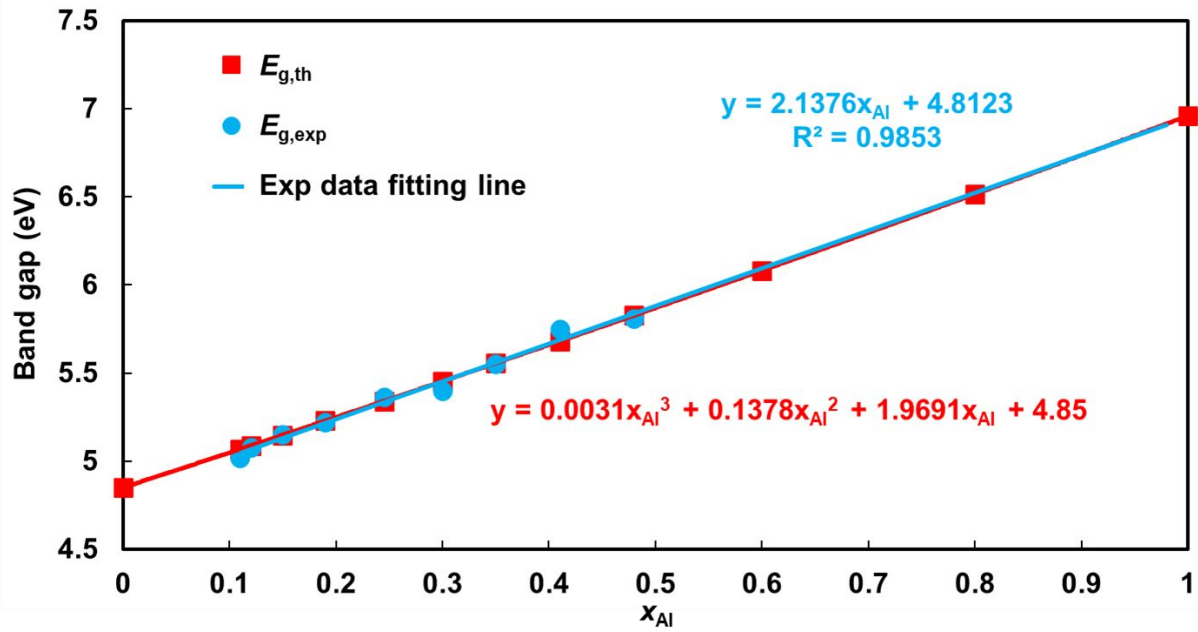

**Figure S2.** Direct optical band gap values vs Al content ( $0.11 \leq x_{Al} \leq 0.48$ ) for PLD polycrystalline films<sup>1</sup> derived from Tauc plots (azure circles). Theoretical band gap values derived according to eqs.8 by assuming (see text):  $\chi_{Al}=1.50$ ;  $B_{\theta-Al_2O_3} = -2.225$  eV;  $A_{\theta-Al_2O_3} = 2.3$ ;  $\chi_{Ga}=1.60$ ;  $B_{\beta-Ga_2O_3} = -2.31$  eV;  $A_{\beta-Ga_2O_3}=1.983$  (red squares).

Fitting procedure of experimental data points was carried out by means of Eq. 8 and by assuming the same values of B and electronegativity, previously used, for fitting the experimental  $E_{g,ind.}$  vs  $x_{Al}$  data sets. In agreement with literature data<sup>8</sup> a value of  $4.85 \pm 0.05$  eV was assumed for the direct band gap value of  $\beta$ - $Ga_2O_3$  from which the value of  $A_2= 1.98$  was derived according to Eq. 1 with  $B = -2.31$  eV. In Figure S2 we report, together with the experimental data, the theoretical values estimated by Eq. 8 providing the following equation:

$$E_{g,th} = 0.0031x_{Al}^3 + 0.1378x_{Al}^2 + 1.9691x_{Al} + 4.85 \quad [eV] \quad [S2]$$

A value of  $A_{Al_2O_3} = 2.30$ , slightly higher (+6%) than the average one of Eq. 3, was derived for  $\theta$ -alumina in front of a slightly lower (-8%) value, used for  $\beta$ - $Ga_2O_3$ . From Eq. S2 a value of 6.96 eV is obtained for the direct band gap of  $\theta$ - $Al_2O_3$  almost coincident with the value derived from fitting the experimental data (see Eq. S1). This last value should be in very good agreement with the value of  $E_g$  reported by Peintinger et al. apart the disagreement on the nature of optical transitions which is reported as indirect.<sup>2</sup>

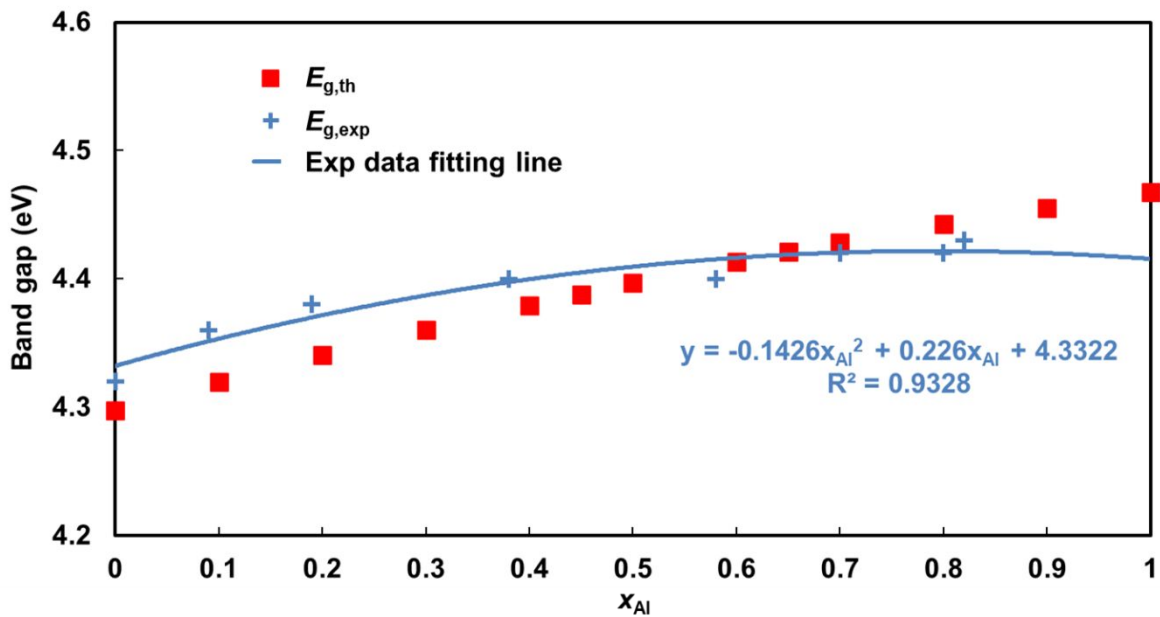

**Figure S3.** Non-direct optical band gap values vs Al content ( $0 \leq x_{Al} \leq 0.8$ ) (blue plus) for amorphous anodic film grown up to 5 V Hg/HgO at  $10 \text{ mV s}^{-1}$  in borate buffer solution on Al-Ta magnetron sputtered alloys of various compositions derived from Tauc plots.

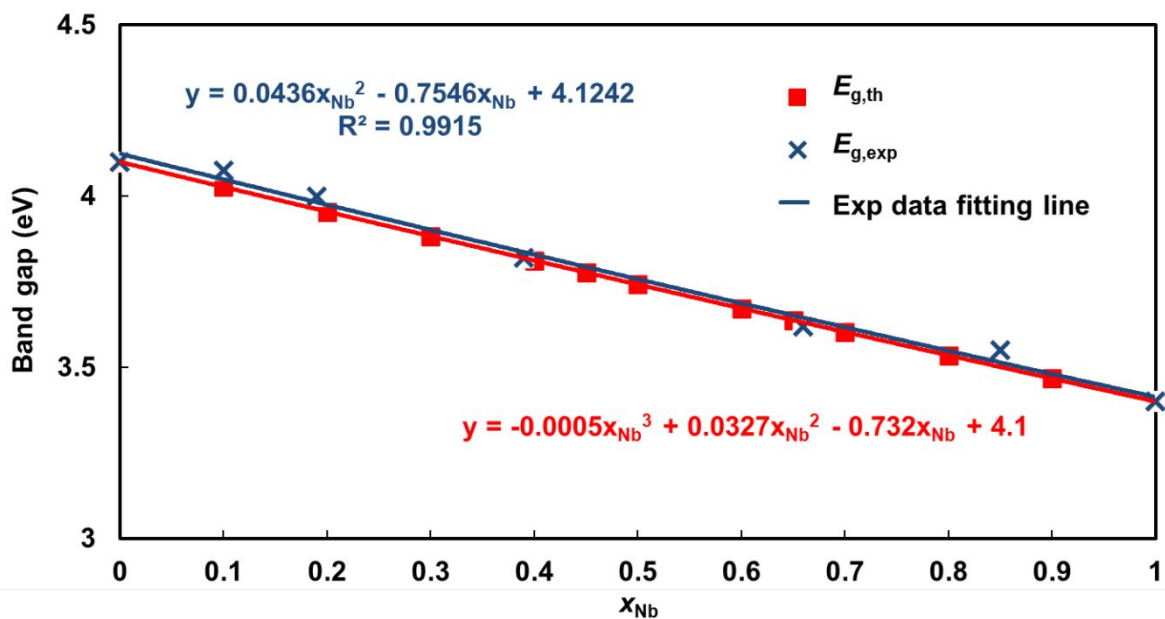

**Figure S4.** Non-direct optical band gap values vs Nb content (blue times symbols) for amorphous anodic film grown up to 5 V Ag/AgCl at  $10 \text{ mV s}^{-1}$  in NaOH solution on Nb-Ta magnetron sputtered alloys of various compositions derived from Tauc plots.

| <b>Polymorph/<br/>phase</b>                                                  | $\chi_1$ | $A_1$ | $B_1$<br>[eV] | $\chi_2$ | $A_2$ | $B_2$<br>[eV] |
|------------------------------------------------------------------------------|----------|-------|---------------|----------|-------|---------------|
| $\alpha$ -(Ga <sub>(1-x)</sub> Al <sub>x</sub> ) <sub>2</sub> O <sub>3</sub> | 1.50     | 2.80  | -2.71         | 1.60     | 2.22  | -2.71         |
| $\beta$ -(Ga <sub>(1-x)</sub> Al <sub>x</sub> ) <sub>2</sub> O <sub>3</sub>  | 1.50     | 2.23  | -2.225        | 1.60     | 1.96  | -2.31         |
| Am (Nb <sub>(1-x)</sub> Al <sub>x</sub> ) <sub>2</sub> O <sub>(5-2x)</sub>   | 1.50     | 1.67  | -2.25         | 1.60     | 1.302 | -1.35         |
| Am (Ta <sub>(1-x)</sub> Al <sub>x</sub> ) <sub>2</sub> O <sub>(5-2x)</sub>   | 1.50     | 1.67  | -2.25         | 1.50     | 1.35  | -1.125        |
| Am (W <sub>(1-x)</sub> Al <sub>2x</sub> )O <sub>3</sub>                      | 1.50     | 1.68  | -2.25         | 1.70     | 1.35  | -1.15         |

**Table S1.** Fitting parameters for the different Al-(Ga, Nb, Ta, W) oxides systems studied in the manuscript (see eq. 8). Element 1: Al, Element 2: cationic partner.

## References

- (1) Schmidt-Grund, R.; Kranert, C.; Von Wenckstern, H.; Zviagin, V.; Lorenz, M.; Grundmann, M. Dielectric Function in the Spectral Range (0.5-8.5)EV of an (Al<sub>x</sub>Ga<sub>1-x</sub>)<sub>2</sub>O<sub>3</sub> Thin Film with Continuous Composition Spread. *J. Appl. Phys.* **2015**, *117* (16), 165307.
- (2) Peintinger, M. F.; Kratz, M. J.; Bredow, T. Quantum-Chemical Study of Stable, Meta-Stable and High-Pressure Alumina Polymorphs and Aluminum Hydroxides. *J. Mater. Chem. A* **2014**, *2* (32), 13143–13158.
- (3) Liu, D.; Guo, Y.; Lin, L.; Robertson, J. First-Principles Calculations of the Electronic Structure and Defects of Al<sub>2</sub>O<sub>3</sub>. *J. Appl. Phys.* **2013**, *114* (8), 083704.
- (4) Wang, T.; Li, W.; Ni, C.; Janotti, A. Band Gap and Band Offset of Ga<sub>2</sub>O<sub>3</sub> and (Al<sub>x</sub>Ga<sub>1-x</sub>)<sub>2</sub>O<sub>3</sub> Alloys. *Phys. Rev. Appl.* **2018**, *10*, 011003.
- (5) Peelaers, H.; Varley, J. B.; Speck, J. S.; Van De Walle, C. G. Structural and Electronic Properties of Ga<sub>2</sub>O<sub>3</sub>-Al<sub>2</sub>O<sub>3</sub> Alloys. *Appl. Phys. Lett.* **2018**, *112* (24), 242101.
- (6) Franchy, R.; Schmitz, G.; Gassmann, P.; Bartolucci, F. Growth of Thin, Crystalline Oxide, Nitride, and Oxynitride Films on NiAl and CoGa Surfaces. *Appl. Phys. A Mater. Sci. Process.* **1997**, *65* (6), 551–566.
- (7) Fares, C.; Ren, F.; Lambers, E.; Hays, D. C.; Gila, B. P.; Pearton, S. J. Valence- and Conduction-Band Offsets for Atomic-Layer-Deposited Al<sub>2</sub>O<sub>3</sub> on (010) (Al<sub>0.14</sub>Ga<sub>0.86</sub>)<sub>2</sub>O<sub>3</sub>. *J. Electron. Mater.* **2019**, *48* (3), 1568–1573.
- (8) Hinuma, Y.; Gake, T.; Oba, F. Band Alignment at Surfaces and Heterointerfaces of Al<sub>2</sub>O<sub>3</sub>, Ga<sub>2</sub>O<sub>3</sub>, In<sub>2</sub>O<sub>3</sub>, and Related Group-III Oxide Polymorphs: A First-Principles Study. *Phys. Rev. Mater.* **2019**, *3* (8), 084605.
